# Supplementary material for: Superior high-voltage aqueous carbon/carbon supercapacitors operating with in situ electrodeposited polyvinyl alcohol borate gel polymer electrolytes
Source: Royal Society of Chemistry journal article supplement (doi:10.1039/c6ta07063a), 2016-01-01
Supplement: c6ta07063a1.pdf [file c6ta07063a1.pdf]

## SUPPORTING INFORMATION

### **Superior high-voltage aqueous carbon/carbon supercapacitors operate with in-situ electrodeposited polyvinyl alcohol borate gel polymer electrolytes**

Mengjin Jiang,<sup>\*ab</sup> Jiadeng Zhu,<sup>b</sup> Chen Chen,<sup>b</sup> Yao Lu,<sup>b</sup> Esra Serife Pampal,<sup>b</sup> Lei Luo,<sup>b</sup> Pei Zhu<sup>b</sup> and Xiangwu Zhang<sup>\*b</sup>

<sup>a</sup> College of Polymer Science and Engineering, Sichuan University, Chengdu, 610065, China

<sup>b</sup> Fiber and Polymer Science Program, Department of Textile Engineering, Chemistry and Science, North Carolina State University, Raleigh, NC 27695-8301, USA

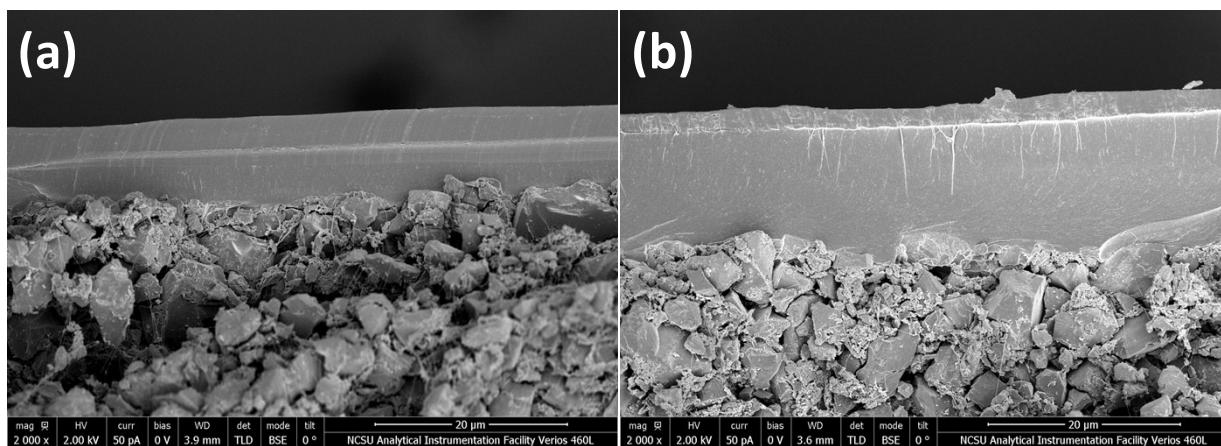

**Fig. S1.** Cross-sectional SEM images of activated carbon electrodes electrodeposited with PVASB gel (a) and PVALB gel (b), respectively.

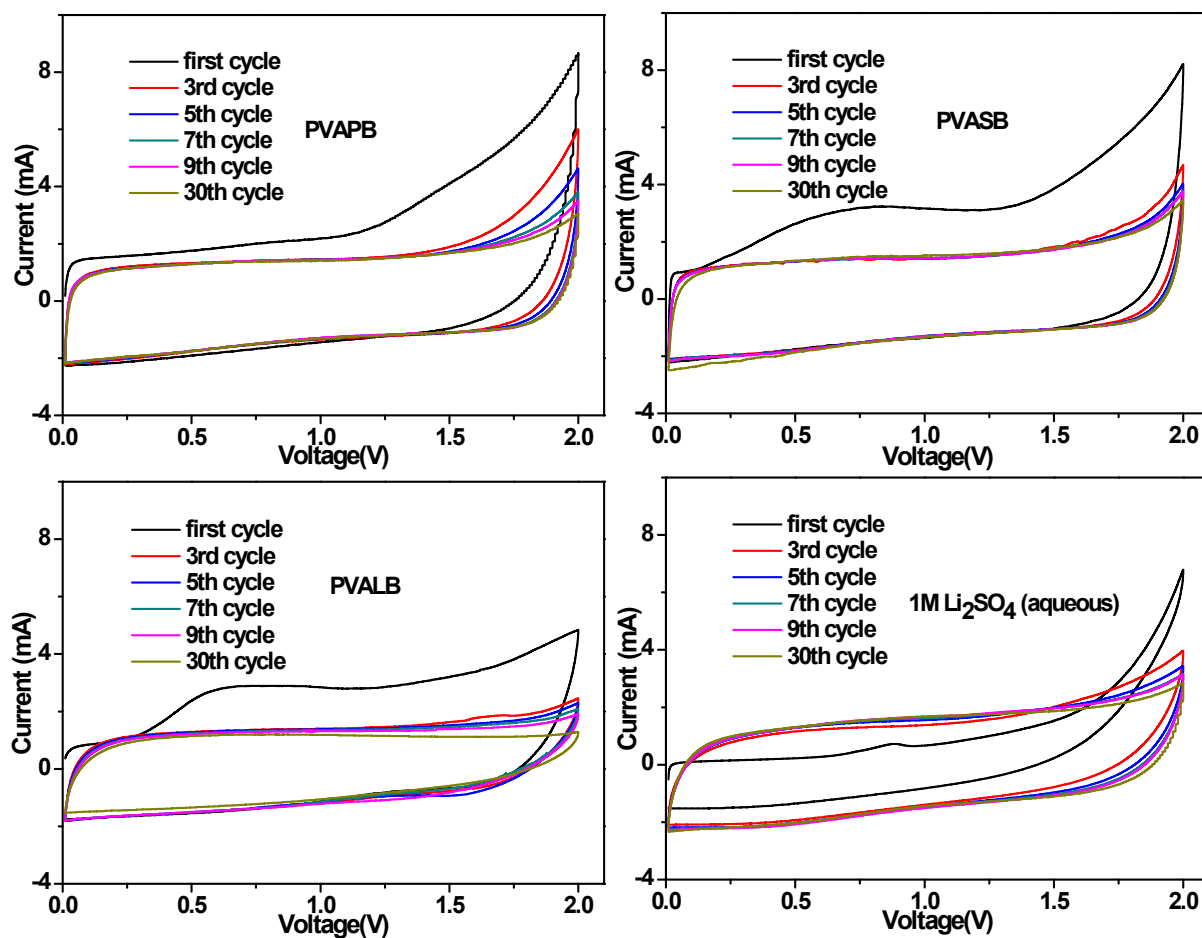

**Fig. S2.** The CV curves of supercapacitors using PVAB GPEs and 1M  $\text{Li}_2\text{SO}_4$  aqueous electrolyte at 1st, 3rd, 5th, 7th, 9th and 30th cycles with a scanning rate of  $1 \text{ mV S}^{-1}$ .

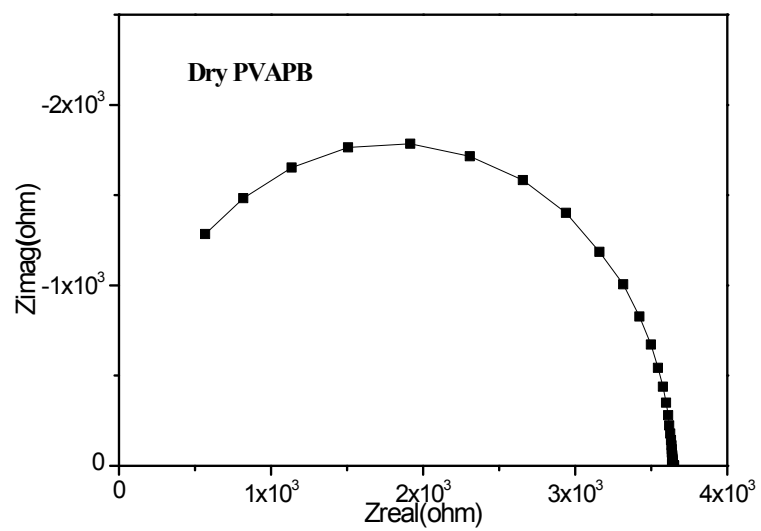

**Fig. S3.** Nyquist plot of carbon supercapacitor using dried PVAPB GPE.

**Table S1.**Electrochemical performances of reported aqueous carbon supercapacitors

| Ref.     | Electrode            | Electrolyte                          | Operation voltage(V) | Specific capacitance (F g <sup>-1</sup> ) / Test current density (A g <sup>-1</sup> ) | Capacitance retention (%) / Cycle numbers | Energy density(Wh kg <sup>-1</sup> )/ Test current density (A g <sup>-1</sup> ) |
|----------|----------------------|--------------------------------------|----------------------|---------------------------------------------------------------------------------------|-------------------------------------------|---------------------------------------------------------------------------------|
| 4.       | activated carbon     | 2M Li <sub>2</sub> SO <sub>4</sub>   | 1.9                  | 130/1                                                                                 | 83/10000                                  | 16.3/1                                                                          |
| 5.       | Carbon               | 1M Li <sub>2</sub> SO <sub>4</sub>   | 2.2                  | 140/1                                                                                 | 85.7/15000                                | 23.5/1                                                                          |
| 27.      | activated carbon     | 0.5M Na <sub>2</sub> SO <sub>4</sub> | 1.6                  | 135/0.2                                                                               | 93/2000                                   | 10.0/1                                                                          |
| 28.      | ball-Milled graphite | 1M Na <sub>2</sub> SO <sub>4</sub>   | 1.6                  | 81/0.2                                                                                | 87/8000                                   | 7.2/0.2                                                                         |
| 29.      | seaweed carbon       | 0.5M Na <sub>2</sub> SO <sub>4</sub> | 1.6                  | 125/0.2                                                                               | 92/10000                                  | 10.7/0.2                                                                        |
| Our work | activated carbon     | PVAPB GPE                            | 2                    | 91.8/0.2                                                                              | 85.8/5000                                 | 9.2/1                                                                           |
